# Supplementary material
Source: PubMed Central journal article supplement (PMC4959087)
Supplement: AEM.04096-15_zam999117128so1.pdf [file AEM.04096-15_zam999117128so1.pdf]

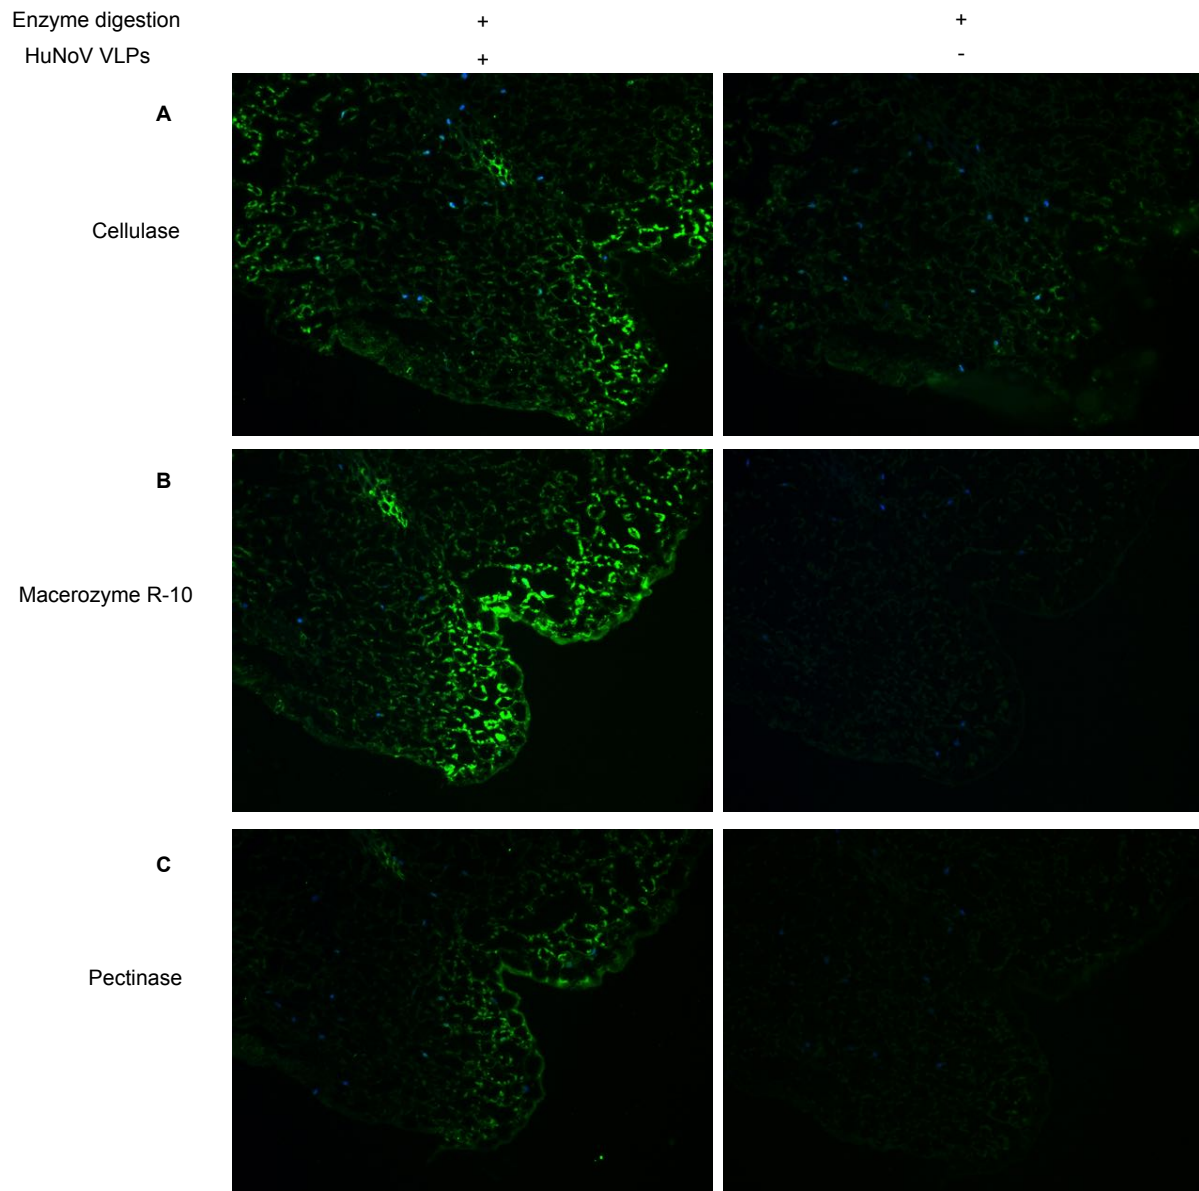

**FIG S1** Effects of enzymatic digestion on binding between NoV VLPs and lettuce. (A) Lettuce paraffin slides were digested with three different cell-wall-digesting enzymes: cellulase from *Trichoderma viride* (A), Macerozyme R-10 from *Rhizopus sp.* (B), and pectinase from *Aspergillus niger* (C). Slides were incubated with 1  $\mu\text{g}/\mu\text{l}$  cell-wall-digesting enzyme for 1 h at 25°C and then incubated with NoV VLPs (left) or with PBS. without VLPs (right). NoV/GII.4/HS194 VLP (green) binding was detected by primary antiserum against NoV/GII.4/HS194 VLPs and Alex Fluor 488-conjugated goat anti-guinea pig IgG antibody. Nuclei were stained with 4',6-diamidino-2- phenylindole (DAPI, blue). All pictures were taken using the same exposure time.

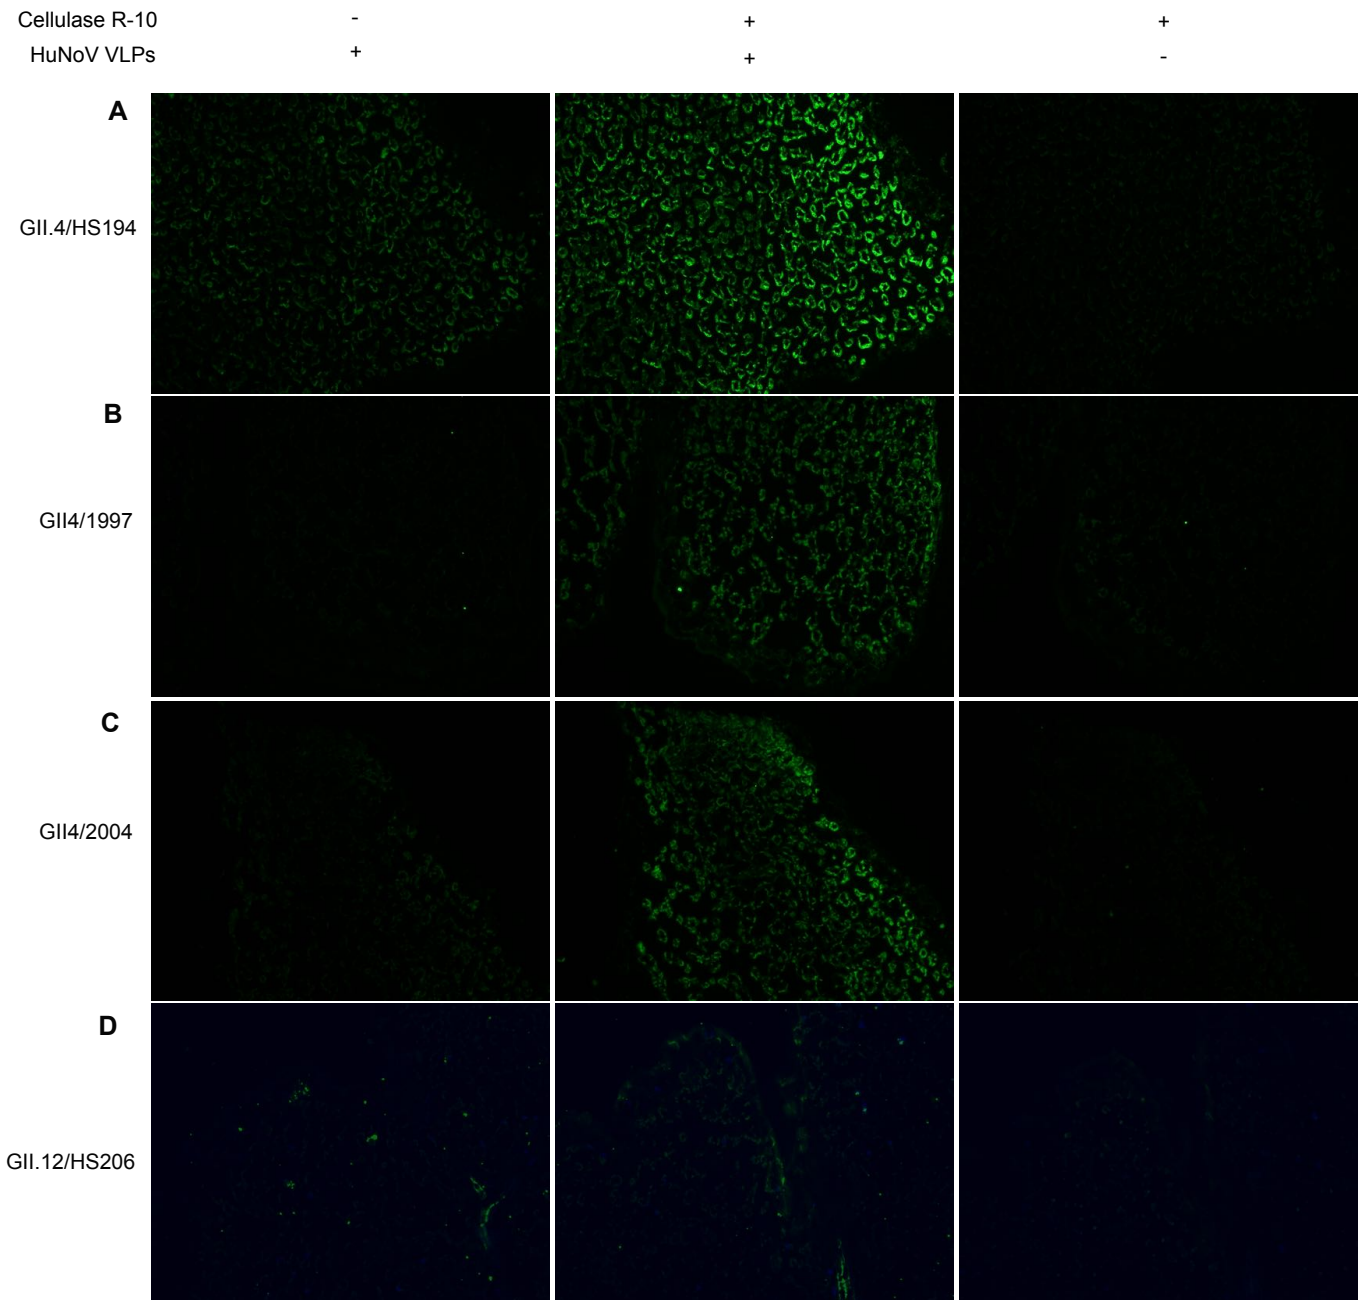

**FIG S2** Binding of different strains of HuNoV VLPs to lettuce. Lettuce paraffin embedded slides were incubated with HuNoV VLPs GII.4/HS194 (A) VLPs GII.4/1997 (B), GII.4/2004 (C) and GII.12/HS206 (D). (left) Control slides incubated with NoV VLPs, but not subjected to cellulase R-10 digestion. (center) Slides digested with cellulase R-10 and then incubated with NoV VLPs. (right) Slides digested with cellulase R-10, but not exposed to NoV VLPs. VLPs binding (green) was detected primary antiserum against VLPs and the Alex Fluor 488-conjugated goat anti-guinea pig IgG antibody. All pictures were taken using the same exposure time.

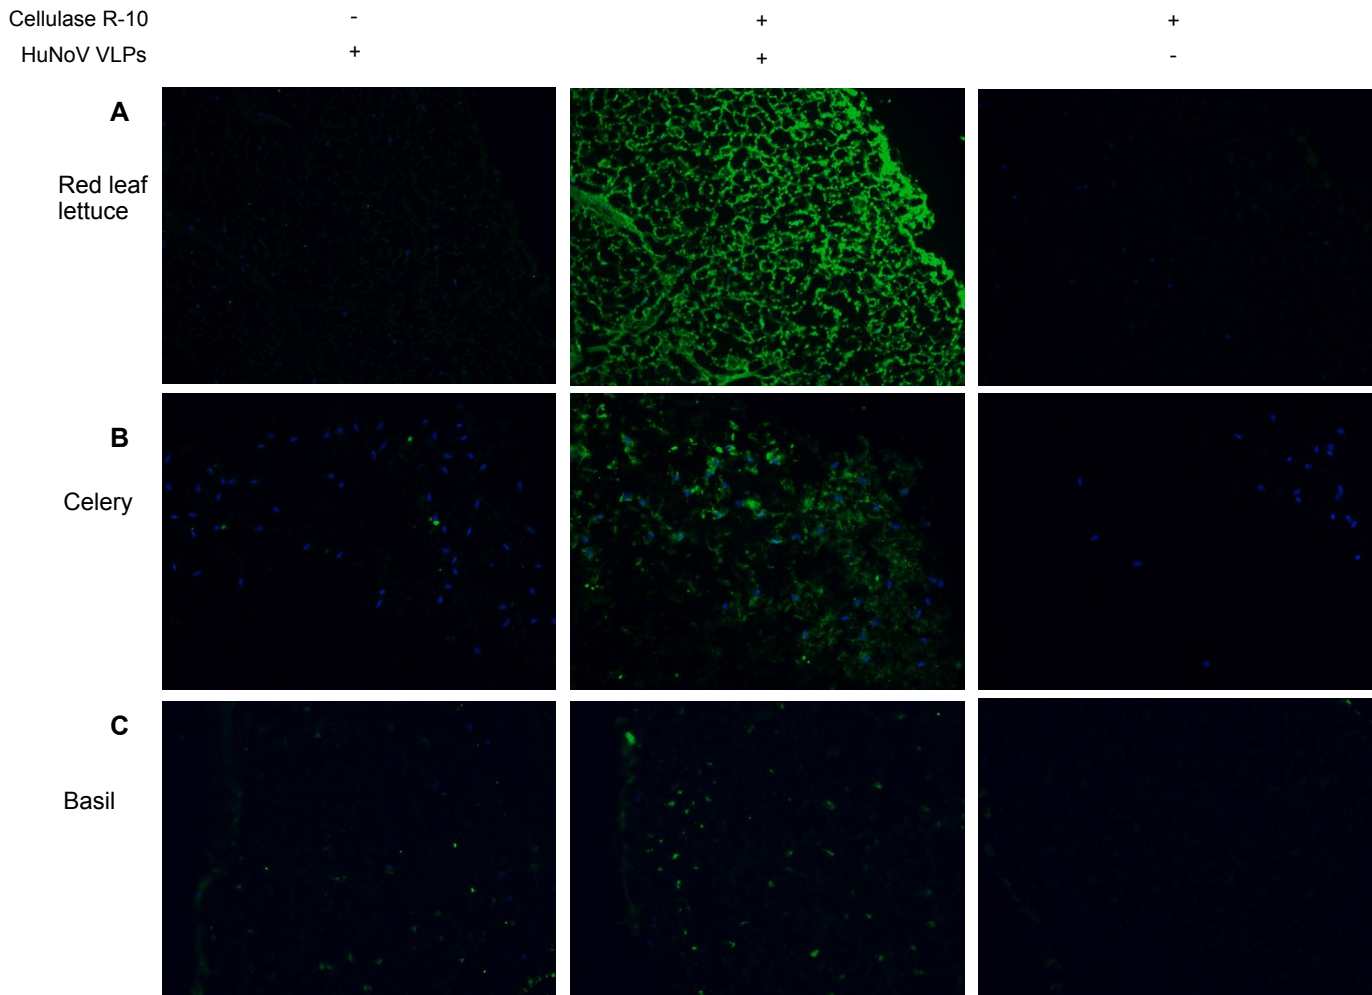

**FIG S3** Binding of HuNoV GII.4/HS194 VLPs to other vegetables. Immunofluorescence microscopy was performed on plants paraffin slides: red leaf lettuce (A), celery vein (B), basil leaves (C). (left) Control slides incubated with NoV VLPs, but not subjected to cellulase R-10 digestion. (center) Slides digested with cellulase R-10 and then incubated with NoV VLPs. (right) Slides digested with cellulase R-10, but not exposed to NoV VLPs. The binding signal (green) was detected by primary antiserum against NoV/GII.4/HS194 VLPs and the Alex Fluor 488-conjugated goat anti-guinea pig IgG antibody. Nuclei were stained with 4',6- diamidino-2- phenylindole (DAPI, blue). All pictures were taken using the same exposure time.
